# Supplementary material for: Klebsiella pneumoniae invasive syndrome with liver abscess and purulent meningitis presenting as acute hemiplegia: a case report
Source: Springer Nature journal article supplement (doi:10.1186/s12879-023-08383-w), 2023-06-12
Supplement: MOESM1 [file 25477188]

**Supplement table 1. Susceptibility test of *K. pneumoniae* isolated from the blood cultures**

| Antibiotic              | Susceptibility | MIC ( $\mu\text{g/mL}$ ) |
|-------------------------|----------------|--------------------------|
| Amikacin                | S              | $\leq 2$                 |
| Ceftazidime             | S              | $\leq 1$                 |
| Ciprofloxacin           | S              | $\leq 0.25$              |
| Cefmetazole             | S              | $\leq 1$                 |
| Cefotaxime              | S              | $\leq 1$                 |
| Cefazolin               | S or I         | $\leq 4$                 |
| Ertapenem               | S              | $\leq 0.5$               |
| Cefepime                | S              | $\leq 1$                 |
| Gentamicin              | S              | $\leq 1$                 |
| Imipenem                | S              | $\leq 0.25$              |
| Levofloxacin            | S              | $\leq 0.12$              |
| Meropenem               | S              | $\leq 0.25$              |
| Sulbactam/Ampicillin    | S              | 4                        |
| Co-trimoxazole          | S              | $\leq 20$                |
| Piperacillin-tazobactam | S              | $\leq 4$                 |

\* S = Susceptible; I = Intermediate; MIC = minimum inhibitory concentration
